# Supplementary material for: PREhabilitation of CAndidates for REnal Transplantation (PreCareTx) study: protocol for a hybrid type I, mixed method, randomised controlled trial
Source: HighWire-hosted journal article supplement (doi:10.1136/bmjopen-2023-072805), 2023-07-01
Supplement: bmjopen-2023-072805supp002_data_supplement.pdf [file bmjopen-2023-072805supp002_data_supplement.pdf]

# Proefpersoneninformatie voor deelname aan medisch-wetenschappelijk onderzoek

## Prehabilitatie voor niertransplantie kandidaten

*PREhabilitation of CAndidates for REnal Transplantation (PreCareTx): A Hybrid Study*

### Inleiding

Geachte heer/mevrouw,

Met deze informatiebrief willen we u vragen of u wilt meedoen aan medisch-wetenschappelijk onderzoek. Meedoen is vrijwillig. U krijgt deze brief omdat u op de wachtlijst staat voor een niertransplantatie in het Universitair Medisch Centrum Groningen (UMCG). U leest hier om wat voor onderzoek het gaat, wat het voor u betekent, en wat de voordelen en nadelen zijn. Het is veel informatie. Wilt u de informatie doorlezen en beslissen of u wilt meedoen? Als u wilt meedoen, kunt u het formulier invullen dat u vindt in bijlage C.

### Stel uw vragen

U kunt uw beslissing nemen met de informatie die u in deze informatiebrief vindt. Daarnaast raden we u aan om dit te doen:

- Stel vragen aan de onderzoeker die u deze informatie geeft.
- Praat met uw partner, familie of vrienden over dit onderzoek.
- Stel vragen aan de onafhankelijk deskundige, dr. A. van Beek .
- Lees de informatie op [www.rijksoverheid.nl/mensenonderzoek](http://www.rijksoverheid.nl/mensenonderzoek)

## 1. Algemene informatie

Het UMCG heeft dit onderzoek opgezet. Hieronder noemen we het UMCG steeds de 'opdrachtgever'.

Onderzoekers voeren het onderzoek uit in het UMCG.

De medisch-ethische toetsingscommissie van het UMCG heeft dit onderzoek goedgekeurd.

## 2. Wat is het doel van het onderzoek?

Het doel van dit onderzoek is na te gaan wat het effect van een prehabilitatie programma is op de algehele conditie van patiënten die op de wachtlijst staan voor een niertransplantatie. Prehabilitatie is een soort revalidatie maar dan voorafgaand aan een operatie. Het doel van prehabilitatie is door veranderingen in leefstijl de conditie van mensen die een operatie moeten ondergaan te verbeteren. Dit betreft zowel de lichamelijke conditie als het geestelijk welzijn. Prehabilitatie bestaat vaak uit verschillende onderdelen, zoals beweegactiviteiten, voedingsadviezen en omgaan met stress of vermoeidheid. Het programma wordt 'op maat' aangeboden zodat het aansluit bij de behoeften en mogelijkheden van u als

deelnemer. Het effect van het prehabilitatie programma vergelijken we met de zorg zoals die gebruikelijk gegeven wordt. De resultaten van dit onderzoek worden gepubliceerd in een medisch blad.

### 3. Wat is de achtergrond van het onderzoek?

Voor patiënten die op de wachtlijst staan voor een niertransplantatie is het van belang om, zowel lichamelijk als geestelijk, in een zo goed mogelijke conditie te zijn voor de transplantatie. De conditie van nierpatiënten is vaak verminderd door de chronische nieraandoening, door nevenaandoeningen en door de dialyse. Uit gegevens van de TransplantLines studie van het UMCG blijkt dat zo'n 90% van de niertransplantatiekandidaten één of meerdere problemen ervaart op het gebied van bewegen, voedingstoestand, vermoeidheid en/of stress.

Prehabilitatie is een programma dat u volgt om uw conditie te verbeteren. Hierdoor kan uw algehele conditie voor de transplantatie verbeteren, maar mogelijk verloopt hierdoor ook het herstel na de transplantatie sneller. Tot nu toe hebben drie onderzoeken laten zien dat de conditie van nierpatiënten verbeterd kan worden met prehabilitatie. In deze onderzoeken is aangetoond dat het volgen van het programma veilig was en dat deelnemers zich fitter voelden, meer energie en een betere conditie hadden, en dat het behulpzaam was bij het voorbereiden op de transplantatie. In deze onderzoeken werden alleen de gevolgen van een beweeg oefenprogramma onderzocht. Ook was het aantal patiënten dat betrokken was bij deze onderzoeken laag (18-37 deelnemers). Daarom willen we in dit onderzoek nagaan wat de effecten zijn van een op maat gemaakt prehabilitatie programma, waarin aandacht wordt besteed aan bewegen, voeding en/of omgaan met de mogelijke gevolgen van het leven met en nierziekte zoals stress of vermoeidheid.

### 4. Hoe verloopt het onderzoek?

*Hoelang duurt het onderzoek?*

Doet u mee met het onderzoek? Dan duurt dat in totaal ongeveer 26 weken.

*Stap 1: bent u geschikt om mee te doen?*

We willen eerst weten of u geschikt bent om mee te doen. Daarom doet de onderzoeker een aantal metingen:

- Voorafgaand aan het geschiktheidsonderzoek in het UMCG vragen we u om drie dagen een dieet dagboekje en het aantal stappen dat u loopt bij te houden. Hiervoor krijgt u een dagboekje en stappenteller thuis gestuurd. Het invullen vraagt ongeveer 15 minuten van uw tijd per dag.
- Voorafgaand aan het geschiktheidsonderzoek in het UMCG vult u een vragenlijst in met vragen over onder andere bewegen, voeding, vermoeidheid, stress en kwaliteit van leven. De vragenlijsten worden toegestuurd via e-mail of in een papieren versie als u dat liever hebt. Het invullen van de vragenlijst duurt ongeveer 60 minuten.
- Tijdens de studie visite in het UMCG wordt uw lichamelijke conditie gemeten met testen zoals een loop- en een fietstest en testen om de kracht in uw handen, armen en benen te meten. Uw voedingstoestand wordt vastgesteld door uw gewicht en lengte te meten en door uw

lichaamssamenstelling te meten met een bio-impedantie analyse. Deze metingen duren ongeveer een uur.

Als uit het geschiktheidsonderzoek blijkt dat u één of meerdere problemen heeft op het gebied van bewegen, voeding of geestelijk welzijn dan komt u in aanmerking voor prehabilitatie. Als er geen problemen worden vastgesteld dan stopt voor u het onderzoek.

### *Stap 2*

Voor het onderzoek maken we 2 groepen:

- Groep 1: interventie groep. De mensen in deze groep ontvangen prehabilitatie naast de gebruikelijk zorg van hun eigen hulpverlener(s)
- Groep 2: controle groep. De mensen in deze groep ontvangen de gebruikelijke zorg van hun eigen hulpverlener(s).

Loting bepaalt in welke groep u komt. U heeft 50% kans om in de interventie groep en 50% kans om in de controle groep terecht te komen.

### *Stap 3: onderzoeken en metingen*

Voor het onderzoek is het nodig dat u nog twee keer naar het UMCG komt. Dit is 13 weken en 26 weken na de loting. De bezoeken aan het UMCG duren ongeveer een uur per keer. We doen de volgende metingen:

- Voorafgaand aan de bezoeken in het UMCG vragen we u om drie dagen een dieet dagboekje en het aantal stappen dat u loopt bij te houden. Hiervoor krijgt u een dagboekje en stappenteller thuis gestuurd. Dit vraagt ongeveer 15 minuten van uw tijd per dag.
- Voorafgaand aan de bezoeken in het UMCG vult u een vragenlijst in met vragen over onder andere bewegen, voeding, vermoeidheid, stress en kwaliteit van leven. De vragenlijsten worden toegestuurd via e-mail of in een papieren versie als u dat liever hebt. Dit vraagt ongeveer 30 minuten van uw tijd per keer.
- Tijdens de studie visite in het UMCG wordt uw lichamelijke conditie weer gemeten met dezelfde testen als bij de eerste meting. Dit zijn testen om zoals een loop- en een fietstest en testen om de kracht in uw handen, armen en benen te meten. Uw voedingstoestand wordt vastgesteld door uw gewicht en lengte te meten en door uw lichaamssamenstelling te meten met een bio-impedantie analyse. Hierin wordt, via elektroden op uw handen en voeten, met een zwakstroom signaal de weerstand in uw lichaam gemeten. Dit duurt enkele seconden en u merkt daar niets van.
- De bezoeken aan het UMCG duren ongeveer een uur per keer.

In bijlage B staat een overzicht van de metingen in het onderzoek beschreven.

#### *Interventiegroep*

De groep die de prehabilitatie interventie krijgt (Groep 1) heeft naast de metingen drie gesprekken met een leefstijlcoach. Als u wilt mag u uw partner of een ander persoon die belangrijk voor u is meenemen. In het gesprek met de leefstijlcoach worden de resultaten van de onderzoeken besproken en samen met u een prehabilitatie programma opgesteld. Dit programma kan verschillende interventies omvatten zoals

beweegoefeningen, werken aan een goede voedingstoestand en/of leren omgaan met vermoeidheid. Wat het programma voor u in gaat houden wordt afgestemd op uw persoonlijke situatie. De afspraken met de leefstijlcoach worden gecombineerd met de afspraak voor de metingen in het UMCG. Deze afspraken duren ongeveer een uur. Voor de eerste afspraak met de leefstijlcoach moet u wel extra naar het UMCG komen. Tijdens het volgen van het prehabilitatie programma, krijgt u begeleiding van een leefstijlcoach. Hiervoor wordt elke week een telefonisch overleg ingepland van ongeveer 15 minuten.

Na het afronden van het prehabilitatie programma, vragen we u om deel te nemen aan een afsluitend groepsinterview met andere deelnemers. Deelname aan het groepsinterview is vrijwillig. Dit interview duurt ongeveer een uur en zal digitaal gehouden worden. Het doel van dit interview is nagaan welke onderdelen van het prehabilitatie programma nog verbeterd kunnen worden. Voorafgaand aan het groepsinterview vragen we u om een vragenlijst in te vullen over uw ervaringen met het prehabilitatie programma.

#### Controle groep

Als u wordt ingeloot in de controle groep (groep 2) ontvangt de gebruikelijk zorg van uw nefroloog of verpleegkundig specialist. Als een diëtist of medisch maatschappelijk werker bij uw zorg betrokken is dan gaat ook deze zorg door zoals u dat gewend bent. U ontvangt wel de uitslagen van de vragenlijsten en lichamelijke testen die op de verschillende meetmomenten gedaan worden voor het onderzoek.

#### *Wat is er anders dan bij gewone zorg?*

Zowel in de controle groep als de interventie groep verandert er niets aan de gebruikelijk zorg. De afspraken die u bij uw arts of verpleegkundig specialist heeft voor de controle van uw nierziekte gaan gewoon door. Wel moet u drie keer (controle groep) of vier keer (interventie groep) naar het UMCG komen voor de metingen die bij het onderzoek horen. Voor de interventiegroep zijn de drie gesprekken met de leefstijlcoach en de wekelijkse begeleiding van de leefstijlcoach extra bovenop de gebruikelijke zorg.

Belangrijk voor u om te weten is dat deelname aan dit onderzoek niet van invloed is op uw transplantatie. Als u tijdens het onderzoek een oproep ontvangt voor een transplantatie dan kan deze gewoon plaatsvinden maar stopt voor u dit onderzoek.

## **5. Welke afspraken maken we met u?**

We willen graag dat het onderzoek goed verloopt. Daarom maken we de volgende afspraken met u:

- U vult de vragenlijsten en voedingsdagboekjes in;
- U draagt een stappenteller zoals afgesproken;
- U komt naar iedere afspraak;
- U volgt het prehabilitatie programma op de manier die u met de leefstijlcoach afgesproken heeft;
- U doet niet mee aan een ander medisch-wetenschappelijk onderzoek gericht op leefstijlverandering;
- U neemt contact op met de onderzoeker in deze situaties:
  - U krijgt plotseling problemen met uw gezondheid;
  - U wilt niet meer meedoen met het onderzoek;

- U krijgt een niertransplantatie tijdens het onderzoek.

## 6. Van welke bijwerkingen, nadelige effecten of ongemakken kunt u last krijgen?

De risico's van deelname aan het onderzoek zijn klein. Uit eerder onderzoek bij patiënten die op de wachtlijst staan voor een orgaantransplantatie is gebleken dat prehabilitatie veilig is.

## 7. Wat zijn de voordelen en de nadelen als u meedoet aan het onderzoek?

Meedoen aan het onderzoek kan voordelen en nadelen hebben. Hieronder zetten we ze op een rij. Denk hier goed over na, en praat erover met anderen.

Voordelen van meedoen aan het onderzoek kunnen zijn:

- U krijgt inzicht in hoe uw conditie is;
- De interventie kan uw algehele conditie verbeteren, maar zeker is dat niet.

Nadelen van meedoen aan het onderzoek kunnen zijn:

- Mogelijke ongemakken van de oefeningen, zoals spierpijn, in het onderzoek.

Deelname aan het onderzoek betekent ook:

- Dat u extra tijd kwijt bent;
- (Extra) testen;
- Dat u afspraken heeft waaraan u zich moet houden;

Al deze zaken zijn hiervoor onder punt 4, 5 en 6 beschreven.

*Wilt u niet meedoen?*

U beslist zelf of u meedoet aan het onderzoek. Meedoen is vrijwillig. Wilt u niet meedoen? Dan verandert er niets, u krijgt de gebruikelijke zorg voor uw nierziekte.

## 8. Wanneer stopt het onderzoek?

De onderzoeker laat het weten als er nieuwe informatie over het onderzoek komt die belangrijk voor u is. De onderzoeker vraagt daarna of u blijft meedoen.

In deze situaties stopt voor u het onderzoek:

- Alle onderzoeken volgens het schema zijn gedaan;
- Het einde van het hele onderzoek is bereikt;
- Als u tijdens de onderzoeksperiode een niertransplantatie ondergaat;
- U wilt zelf stoppen met het onderzoek. Dat mag op ieder moment. Meld dit dan meteen bij de onderzoeker. U hoeft niet te vertellen waarom u stopt. U krijgt dan weer de gebruikelijke behandeling voor uw nierziekte. De onderzoeker zal u nog wel uitnodigen voor een nacontrole;

- De onderzoeker vindt het beter voor u om te stoppen. De onderzoeker zal u nog wel uitnodigen voor een nacontrole;
- Een van de volgende instanties besluit dat het onderzoek moet stoppen:
  - De overheid;
  - De medisch-ethische commissie die het onderzoek beoordeelt.

#### *Wat gebeurt er als u stopt met het onderzoek?*

De onderzoekers gebruiken de gegevens die tot het moment van stoppen zijn verzameld.

### **9. Wat gebeurt er na het onderzoek?**

#### *Krijgt u de resultaten van het onderzoek?*

Het onderzoek loopt tot september 2025. Daarna laat de onderzoeker u weten wat de belangrijkste uitkomsten zijn van het onderzoek. Tot die tijd wordt u geïnformeerd over de voortgang van het onderzoek in een nieuwsbrief.

### **10. Wat doen we met uw gegevens?**

Doet u mee met het onderzoek? Dan geeft u ook toestemming om uw gegevens te verzamelen, gebruiken en bewaren.

#### *Welke gegevens bewaren we?*

We bewaren deze gegevens:

- uw naam;
- uw geslacht;
- uw adres;
- uw leeftijd;
- gegevens over uw gezondheid;
- (medische) gegevens die we tijdens het onderzoek verzamelen.

#### *Waarom verzamelen, gebruiken en bewaren we uw gegevens?*

We verzamelen, gebruiken en bewaren uw gegevens om de vragen van dit onderzoek te kunnen beantwoorden. En om de resultaten te kunnen publiceren in een medisch tijdschrift.

#### *Hoe beschermen we uw privacy?*

Om uw privacy te beschermen geven wij uw gegevens een code. Op al uw gegevens zetten we alleen deze code. De sleutel van de code bewaren we op een beveiligde plek in het ziekenhuis. Als we uw gegevens verwerken, gebruiken we steeds alleen die code. Ook in rapporten en publicaties over het onderzoek kan niemand terughalen dat het over u ging.

#### *Wie kunnen uw gegevens zien?*

Sommige personen kunnen wel uw naam en andere persoonlijke gegevens zonder code inzien. Dit kunnen gegevens zijn die speciaal voor dit onderzoek zijn verzameld, maar ook gegevens uit uw medisch dossier. Dit zijn mensen die controleren of de onderzoekers het onderzoek goed en betrouwbaar uitvoeren. Deze personen kunnen bij uw gegevens komen:

- Een controleur die voor de onderzoeker werkt;

Deze personen houden uw gegevens geheim. Wij vragen u voor deze inzage toestemming te geven. De Inspectie Gezondheidszorg en Jeugd kan zonder uw toestemming uw gegevens inzien.

#### *Hoelang bewaren we uw gegevens en lichaamsmateriaal?*

We bewaren uw gegevens 15 jaar in het ziekenhuis.

#### *Mogen we uw gegevens gebruiken voor ander onderzoek?*

Uw gegevens kunnen na afloop van dit onderzoek ook van belang zijn voor ander wetenschappelijk onderzoek op het gebied van niertransplantatie. Als u meedoet aan het TransplantLines onderzoek van het UMCG worden uw gegevens van de vragenlijst ook daarvoor gebruikt. Dan hoeft u deze vragenlijsten niet nog een keer in te vullen. In het toestemmingformulier geeft u aan of u dit goed vindt. Geeft u geen toestemming? Dan kunt u nog steeds meedoen met dit onderzoek maar worden uw gegevens niet gekoppeld aan het TransplantLines onderzoek. U krijgt dezelfde zorg.

#### *Wat gebeurt er bij onverwachte ontdekkingen?*

Tijdens het onderzoek kunnen we toevallig iets vinden dat belangrijk is voor uw gezondheid. De onderzoeker neemt dan contact op met uw medisch specialist. U bespreekt dan met uw specialist wat er moet gebeuren. U geeft met het formulier toestemming voor het informeren van uw specialist.

#### *Kunt u uw toestemming voor het gebruik van uw gegevens weer intrekken?*

U kunt uw toestemming voor het gebruik van uw gegevens op ieder moment intrekken. Maar let op: trekt u uw toestemming in, en hebben onderzoekers dan al gegevens verzameld voor een onderzoek? Dan mogen zij deze gegevens nog wel gebruiken.

#### *Wilt u meer weten over uw privacy?*

- Wilt u meer weten over uw rechten bij de verwerking van persoonsgegevens? Kijk dan op [www.autoriteitpersoonsgegevens.nl](http://www.autoriteitpersoonsgegevens.nl)
- Heeft u vragen over uw rechten? Of heeft u een klacht over de verwerking van uw persoonsgegevens? Neem dan contact op met degene die verantwoordelijk is voor de verwerking van uw persoonsgegevens. Voor uw onderzoek is dat:
  - Avril Haanstra, UMCG. Zie bijlage A voor contactgegevens.
- Als u klachten heeft over de verwerking van uw persoonsgegevens, raden we u aan om deze eerst te bespreken met het onderzoeksteam. U kunt ook naar de Functionaris Gegevensbescherming van het UMCG gaan. In bijlage A staat waar u die kunt vinden. Of u dient een klacht in bij de Autoriteit Persoonsgegevens.

*Waar vindt u meer informatie over het onderzoek?*

Op de volgende website(s) vindt u meer informatie over het onderzoek: [www.ClinicalTrials.gov](http://www.ClinicalTrials.gov). Na het onderzoek kan de website een samenvatting van de resultaten van dit onderzoek tonen. U vindt het onderzoek door te zoeken op NCT05489432.

### **11. Krijgt u een vergoeding als u meedoet aan het onderzoek?**

De extra testen voor het onderzoek kosten u niets. U krijgt ook geen vergoeding als u meedoet aan dit onderzoek. Wel krijgt u een vergoeding voor uw (extra) reiskosten (€ 0.19/km en parkeerkosten).

### **12. Bent u verzekerd tijdens het onderzoek?**

U bent niet extra verzekerd voor dit onderzoek. Want meedoen aan het onderzoek heeft geen extra risico's. Daarom hoeft de onderzoeker van de METc geen extra verzekering af te sluiten

### **13. We informeren uw behandelend specialist**

De onderzoeker stuurt uw behandelend specialist een brief om te laten weten dat u meedoet aan het onderzoek. Dit is voor uw eigen veiligheid.

### **14. Heeft u vragen?**

Vragen over het onderzoek kunt u stellen aan de onderzoeker. Wilt u advies van iemand die er geen belang bij heeft? Neem dan contact op met dr. A.P. van Beek. Hij weet veel over het onderzoek, maar werkt niet mee aan dit onderzoek.

Heeft u een klacht? Bespreek dit dan met de onderzoeker of de arts die u behandelt. Wilt u dit liever niet? Ga dan naar klachtencommissie van uw ziekenhuis. In bijlage A staat waar u die kunt vinden.

### **15. Hoe geeft u toestemming voor het onderzoek?**

U kunt eerst rustig nadenken over dit onderzoek. Daarna vertelt u de onderzoeker of u de informatie begrijpt en of u wel of niet wilt meedoen. Wilt u meedoen? Dan vult u het toestemmingsformulier in dat u bij deze informatiebrief vindt. U en de onderzoeker krijgen allebei een getekende versie van deze toestemmingsverklaring.

Dank voor uw tijd.



**16. Bijlagen bij deze informatie**

- A. Contactgegevens
- B. Overzicht metingen
- C. Toestemmingsformulier proefpersoon

## Bijlage A: contactgegevens UMCG

Hoofd onderzoeker:

Dr. Coby Annema

Email: [j.h.annema@umcg.nl](mailto:j.h.annema@umcg.nl)

Tel: 050 361 1490

Bereikbaarheid: maandag-dinsdag-donderdag-vrijdag (9:00 – 17:00 uur)

Voor een eventueel 2<sup>de</sup> aanspreekpunt:

Drs. Avril Haanstra

Email: [a.j.haanstra@umcg.nl](mailto:a.j.haanstra@umcg.nl)

Tel: 06 2565 1034

Bereikbaarheid: maandag tot vrijdag (9:00 – 17:00 uur)

Onafhankelijk arts:

Dr. A.P. van Beek

Internist/ endocrinoloog

Email: [a.p.van.beek@umcg.nl](mailto:a.p.van.beek@umcg.nl)

Bereikbaarheid: maandag tot vrijdag (9:00 – 17:00 uur)

Klachten:

Wanneer u een klacht heeft over de gang van zaken omtrent het onderzoek, kunt u dit melden bij de hoofdonderzoeker. Indien u dat niet wilt, kunt u terecht bij de onafhankelijk klachtenfunctionaris via: (050) 361 22 20 (secretariaat) of [klachtenfunctionaris@umcg.nl](mailto:klachtenfunctionaris@umcg.nl).

Wanneer u klachten heeft over de behandeling kunt u contact opnemen met het team Patiënten informatie via: (050) 361 33 00 of [patienteninformatie@bvl.umcg.nl](mailto:patienteninformatie@bvl.umcg.nl)

De functionarissen voor de Gegevensbescherming van het UMCG zijn te bereiken via [privacy@umcg.nl](mailto:privacy@umcg.nl)

Voor meer informatie over uw rechten: [www.autoriteitpersoonsgegevens.nl](http://www.autoriteitpersoonsgegevens.nl)

## Bijlage B: Overzicht metingen

Hieronder vindt u een schematisch overzicht van het PreCareTx-onderzoek.

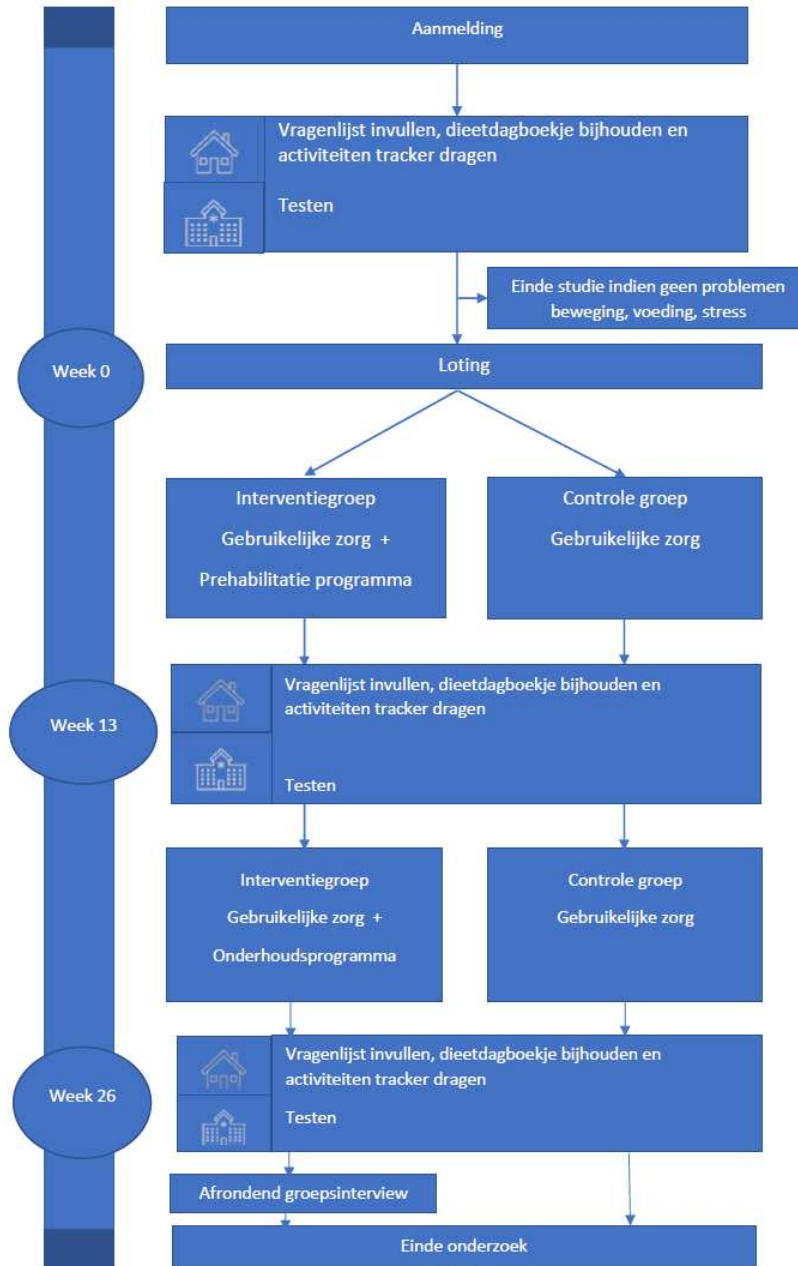

## Bijlage C: toestemmingsformulier proefpersoon

Behorende bij

Prehabilitatie voor niertransplantiekandidaten (PreCareTx-onderzoek)

- Ik heb de informatiebrief gelezen. Ook kon ik vragen stellen. Mijn vragen zijn goed genoeg beantwoord. Ik had genoeg tijd om te beslissen of ik meedoe.
- Ik weet dat meedoen vrijwillig is. Ook weet ik dat ik op ieder moment kan beslissen om toch niet mee te doen met het onderzoek. Of om ermee te stoppen. Ik hoef dan niet te zeggen waarom ik wil stoppen.
- Ik geef de onderzoeker toestemming om mijn specialist te laten weten dat ik meedoe aan dit onderzoek.
- Ik geef de onderzoeker toestemming om mijn huisarts of specialist informatie te geven over onverwachte bevindingen uit het onderzoek die van belang zijn voor mijn gezondheid.
- Ik geef de onderzoekers toestemming om mijn gegevens te verzamelen en gebruiken. De onderzoekers doen dit alleen om de onderzoeksvraag van dit onderzoek te beantwoorden.
- Ik weet dat voor de controle van het onderzoek sommige mensen al mijn gegevens kunnen inzien. Die mensen staan in deze informatiebrief. Ik geef deze mensen toestemming om mijn gegevens in te zien voor deze controle.
- Wilt u in de tabel hieronder ja of nee aankruisen?

|                                                                                                                              |                             |                              |
|------------------------------------------------------------------------------------------------------------------------------|-----------------------------|------------------------------|
| Ik geef toestemming om mijn gegevens te bewaren om dit te gebruiken voor ander onderzoek, zoals in de informatiebrief staat. | Ja <input type="checkbox"/> | Nee <input type="checkbox"/> |
| Ik geef toestemming om mij eventueel na dit onderzoek te vragen of ik wil meedoen met een vervolgonderzoek.                  | Ja <input type="checkbox"/> | Nee <input type="checkbox"/> |

Ik wil meedoen aan dit onderzoek.

Mijn naam is (proefpersoon): .....

Handtekening: .....

Datum : \_\_ / \_\_ / \_\_

-----

Ik verklaar dat ik deze proefpersoon volledig heb geïnformeerd over het genoemde onderzoek.

Wordt er tijdens het onderzoek informatie bekend die de toestemming van de proefpersoon kan beïnvloeden?  
Dan laat ik dit op tijd weten aan deze proefpersoon.

Naam onderzoeker (of diens vertegenwoordiger):.....

Handtekening:.....

Datum: \_\_ / \_\_ / \_\_

-----

*De proefpersoon krijgt een volledige informatiebrief mee, samen met een getekende versie van het toestemmingsformulier.*
